# Supplementary material for: Dealing with multi‐source and multi‐scale information in plant phenomics: the ontology‐driven Phenotyping Hybrid Information System
Source: PubMed Central journal article supplement (PMC6585972; doi:10.1111/nph.15385), 2018-08-28
Supplement: NPH-221-588-s002.pdf [file NPH-221-588-s002.pdf]

# Events and Annotations

The Events menu allows searching and visualising events and annotations performed in the different objects (e.g. plants, sensors, experiments) declared in the information system.

Different filters can be applied based on **Dates**, **Type**, **Description** of events or the **Concern** or **Alias** object (Fig. 1). As an example, searching for plant 795 (having the URI `m3p:/arch/2017/c17000795`) in the **Concern** box, results in seven different events describing:

- `oevv:Sowing` => sowing pf the plant
- `oevv:Thinning` => installation of plant tutors
- `oevv:Fertilization` => fertilizer application
- `oeev:Stacking` => installation of plant tutors
- `oevv:MoveTo` => displacement event
- `oevv:StuckPlant` => an incident occurred during imaging
- `oevv:Harvesting` => harvesting of the plant

## Events

Date Range

|            |     |          |
|------------|-----|----------|
| Start Date | and | End Date |
|------------|-----|----------|

Refresh

Showing 1-7 of 7 items.

| # | Type               | Description                                                        | Concern                                                                | Alias                                                 | Date of Event                            |
|---|--------------------|--------------------------------------------------------------------|------------------------------------------------------------------------|-------------------------------------------------------|------------------------------------------|
|   | event              |                                                                    |                                                                        | 795                                                   |                                          |
| 1 | oeev:StuckPlant    | Plant blocked during imaging (15/5/17 7h). Measured biomass = 406g | <a href="http://m3p:/arch/2017/c17000795">m3p:/arch/2017/c17000795</a> | 0795/DZ_PG_33/ZM4353 /WWW/Rep_4/14_15 /ARCH2017-03-30 | 2017-05-15T12:00:00+01:00T02:30:45+02:00 |
| 2 | oeev:Harvesting    | Harvesting of the plant                                            | <a href="http://m3p:/arch/2017/c17000795">m3p:/arch/2017/c17000795</a> | 0795/DZ_PG_33/ZM4353 /WWW/Rep_4/14_15 /ARCH2017-03-30 | 2017-05-15T12:00:00+01:00                |
| 3 | oeev:Fertilization | Addition of 4 g of fertiliser per pot                              | <a href="http://m3p:/arch/2017/c17000795">m3p:/arch/2017/c17000795</a> | 0795/DZ_PG_33/ZM4353 /WWW/Rep_4/14_15 /ARCH2017-03-30 | 2017-04-27T12:00:00+01:00                |
| 4 | oeev:Staking       | Installation of plant tutors (83 g)                                | <a href="http://m3p:/arch/2017/c17000795">m3p:/arch/2017/c17000795</a> | 0795/DZ_PG_33/ZM4353 /WWW/Rep_4/14_15 /ARCH2017-03-30 | 2017-04-18T12:00:00+01:00                |
| 5 | oeev:Thinning      | Thinning to 1 plant per pot                                        | <a href="http://m3p:/arch/2017/c17000795">m3p:/arch/2017/c17000795</a> | 0795/DZ_PG_33/ZM4353 /WWW/Rep_4/14_15 /ARCH2017-03-30 | 2017-04-13T12:00:00+01:00                |
| 6 | oeev:Sowing        | Sowing at PHENOARCH platform                                       | <a href="http://m3p:/arch/2017/c17000795">m3p:/arch/2017/c17000795</a> | 0795/DZ_PG_33/ZM4353 /WWW/Rep_4/14_15 /ARCH2017-03-30 | 2017-04-06T12:00:00+01:00                |
| 7 | oeev:MoveTo        | Arrival at PHENOARCH platform                                      | <a href="http://m3p:/arch/2017/c17000795">m3p:/arch/2017/c17000795</a> | 0795/DZ_PG_33/ZM4353 /WWW/Rep_4/14_15 /ARCH2017-03-30 | 2017-04-06T12:00:00+01:00                |

Detailed information of each event can be displayed including **RDF triples** (Fig. 2). For instance the event <http://www.phenome-fppn.fr/id/event/5878e232-c4b8-4fb8-b705-1988540dcfd2> describing the `Harvesting` of plant 795 is formulated as:

<http://www.phenome-fppn.fr/id/event/efb8946f-799d-4c02-b425-3fbf637c122b>

|                                                                   |                                                                                                         |
|-------------------------------------------------------------------|---------------------------------------------------------------------------------------------------------|
| <a href="#">Add annotation</a> <a href="#">Browse Triplestore</a> |                                                                                                         |
| Type                                                              | oeev:Harvesting                                                                                         |
| Description                                                       | Harvesting of the plant                                                                                 |
| Author                                                            | <a href="http://www.phenome-fppn.fr/id/agent/lcabrera">http://www.phenome-fppn.fr/id/agent/lcabrera</a> |
| Date of Event                                                     | 2017-05-15T12:00:00+01:00                                                                               |
| Concern                                                           | <a href="m3p/arch/2017/c17000795">m3p/arch/2017/c17000795</a>                                           |
| Alias                                                             | 0795/DZ_PG_33/ZM4353/WW/Rep_4/14_15/ARCH2017-03-30                                                      |

<http://www.phenome-fppn.fr/id/event/efb8946f-799d-4c02-b425-3fbf637c122b>

| <a href="#">Add annotation</a> <a href="#">Add Event</a> |                                                                                                                                                                 |                                                         |                                                                                                                                                                 |
|----------------------------------------------------------|-----------------------------------------------------------------------------------------------------------------------------------------------------------------|---------------------------------------------------------|-----------------------------------------------------------------------------------------------------------------------------------------------------------------|
| Showing 1-4 of 4 items.                                  |                                                                                                                                                                 |                                                         |                                                                                                                                                                 |
| #                                                        | Subject                                                                                                                                                         | Predicate                                               | Object or Litteral                                                                                                                                              |
|                                                          | <input type="text" value="Type in some characters..."/>                                                                                                         | <input type="text" value="Type in some characters..."/> | <input type="text" value="Type in some characters..."/>                                                                                                         |
| 1                                                        | <a href="annotation/fcdcb1ce-8e44-4808-adc4-0515a3edf25f">annotation/fcdcb1ce-8e44-4808-adc4-0515a3edf25f</a>                                                   | oa:hasTarget                                            | <a href="http://www.phenome-fppn.fr/id/event/efb8946f-799d-4c02-b425-3fbf637c122b">http://www.phenome-fppn.fr/id/event/efb8946f-799d-4c02-b425-3fbf637c122b</a> |
| 2                                                        | <a href="http://www.phenome-fppn.fr/id/event/efb8946f-799d-4c02-b425-3fbf637c122b">http://www.phenome-fppn.fr/id/event/efb8946f-799d-4c02-b425-3fbf637c122b</a> | oeev:concern                                            | <a href="m3p/arch/2017/c17000795">m3p/arch/2017/c17000795</a>                                                                                                   |
| 3                                                        | <a href="http://www.phenome-fppn.fr/id/event/efb8946f-799d-4c02-b425-3fbf637c122b">http://www.phenome-fppn.fr/id/event/efb8946f-799d-4c02-b425-3fbf637c122b</a> | rdf:type                                                | oeev:Harvesting                                                                                                                                                 |
| 4                                                        | <a href="http://www.phenome-fppn.fr/id/event/efb8946f-799d-4c02-b425-3fbf637c122b">http://www.phenome-fppn.fr/id/event/efb8946f-799d-4c02-b425-3fbf637c122b</a> | time:hasTime                                            | <a href="instant:/06a68a04-d669-4388-90b2-f6dc3bf206fa">instant:/06a68a04-d669-4388-90b2-f6dc3bf206fa</a>                                                       |

where is of type harvesting (**rdf:type**), concerns plant 795 (**event:concern**), and has and associated time stamp (**time:hasTime**). Details of the timings of the event (**time:inXSDDateTimeStamp**) and its annotation are described in Fig. 3 as:

[http://www.phenome-fppn.fr/m3p/arch/2018/tic18\\_3efdc550-5294-479d-b8ec-ef17e19b2ce6](http://www.phenome-fppn.fr/m3p/arch/2018/tic18_3efdc550-5294-479d-b8ec-ef17e19b2ce6)

| <a href="#">Add annotation</a> |                                                                                                                                                                                       |                                                      |                                                                                                                                                                                       |
|--------------------------------|---------------------------------------------------------------------------------------------------------------------------------------------------------------------------------------|------------------------------------------------------|---------------------------------------------------------------------------------------------------------------------------------------------------------------------------------------|
| Showing 1-4 of 4 items.        |                                                                                                                                                                                       |                                                      |                                                                                                                                                                                       |
| #                              | Subject                                                                                                                                                                               | Predicate                                            | Object or Litteral                                                                                                                                                                    |
|                                | <input type="text" value="Type in some characters"/>                                                                                                                                  | <input type="text" value="Type in some characters"/> | <input type="text" value="Type in some character"/>                                                                                                                                   |
| 1                              | <a href="m3p/arch/2018/evc18_6851fb51-efa6-44ff-bc4d-bf1cfa98f576">m3p/arch/2018/evc18_6851fb51-efa6-44ff-bc4d-bf1cfa98f576</a>                                                       | time:hasTime                                         | <a href="http://www.phenome-fppn.fr/m3p/arch/2018/tic18_3efdc550-5294-479d-b8ec-ef17e19b2ce6">http://www.phenome-fppn.fr/m3p/arch/2018/tic18_3efdc550-5294-479d-b8ec-ef17e19b2ce6</a> |
| 2                              | <a href="http://www.phenome-fppn.fr/m3p/arch/2018/tic18_3efdc550-5294-479d-b8ec-ef17e19b2ce6">http://www.phenome-fppn.fr/m3p/arch/2018/tic18_3efdc550-5294-479d-b8ec-ef17e19b2ce6</a> | rdf:type                                             | time:Instant                                                                                                                                                                          |
| 3                              | <a href="http://www.phenome-fppn.fr/m3p/arch/2018/tic18_3efdc550-5294-479d-b8ec-ef17e19b2ce6">http://www.phenome-fppn.fr/m3p/arch/2018/tic18_3efdc550-5294-479d-b8ec-ef17e19b2ce6</a> | time:inXSDDateTimeStamp                              | 2017-05-15T12:00:00+01:00                                                                                                                                                             |
| 4                              | <a href="http://www.phenome-fppn.fr/m3p/arch/2018/tic18_3efdc550-5294-479d-b8ec-ef17e19b2ce6">http://www.phenome-fppn.fr/m3p/arch/2018/tic18_3efdc550-5294-479d-b8ec-ef17e19b2ce6</a> | dcterms:created                                      | 2018-03-28T11:41:16.418771                                                                                                                                                            |

The harvesting event <http://www.phenome-fppn.fr/id/event/5878e232-c4b8-4fb8-b7051988540dcfd2> concerning the plant 795 is associated to the annotation <http://www.phenomefppn.fr/id/annotation/f3fb3f7c-b4a0-4531-b3de-5cfd8b4b2b28> via **oa:hasTarget**. Details of the annotation, such as the type **oa:Annotation**, the **oa:bodyValue** 'Harvesting of the plant' and the time that event was annotated (**dcterms:created**) and the person who did the annotation (**dcterms:creator**) are described below (Fig. 4):

<http://www.phenome-fppn.fr/id/annotation/1f6076b9-8699-4327-a575-a71f04c03b3b>

Add annotation Add Event

Showing 1-20 of 1,679 items.

| # | Subject                                                                                                                                                                   | Predicate                             | Object or Literal                                       |
|---|---------------------------------------------------------------------------------------------------------------------------------------------------------------------------|---------------------------------------|---------------------------------------------------------|
|   | <input type="text" value="Type in some characters..."/>                                                                                                                   | <input type="text" value="lcreated"/> | <input type="text" value="Type in some characters..."/> |
| 1 | <a href="http://www.phenome-fppn.fr/id/annotation/1f6076b9-8699-4327-a575-a71f04c03b3b">http://www.phenome-fppn.fr/id/annotation/1f6076b9-8699-4327-a575-a71f04c03b3b</a> | dcterms:creator                       | <a href="#">pxPhenome /id/agent/lcabrera</a>            |
| 2 | <a href="http://www.phenome-fppn.fr/id/annotation/1f6076b9-8699-4327-a575-a71f04c03b3b">http://www.phenome-fppn.fr/id/annotation/1f6076b9-8699-4327-a575-a71f04c03b3b</a> | rdf:type                              | oa:Annotation                                           |
| 3 | <a href="http://www.phenome-fppn.fr/id/annotation/1f6076b9-8699-4327-a575-a71f04c03b3b">http://www.phenome-fppn.fr/id/annotation/1f6076b9-8699-4327-a575-a71f04c03b3b</a> | oa:bodyValue                          | Harvesting of the plant                                 |

## Annotations

Annotations are mainly guided by the **OEev ontology** and the **Web Annotation Data Model** that allows annotating any object declared in the system and assigning motivation and purpose attributes to annotations (e.g. oa:describing, oa:identifying, oa:linking, oa: replying, etc.).

```
'http://www.w3.org/ns/oa#describing' => 'oa:describing',
'http://www.w3.org/ns/oa#identifying' => 'oa:identifying',
'http://www.w3.org/ns/oa#moderating' => 'oa:moderating',
'http://www.w3.org/ns/oa#assessing' => 'oa:assessing',
'http://www.w3.org/ns/oa#bookmarking' => 'oa:bookmarking',
'http://www.w3.org/ns/oa#classifying' => 'oa:classifying',
'http://www.w3.org/ns/oa#commenting' => 'oa:commenting',
'http://www.w3.org/ns/oa#editing' => 'oa:editing',
'http://www.w3.org/ns/oa#highlighting' => 'oa:highlighting',
'http://www.w3.org/ns/oa#linking' => 'oa:linking',
'http://www.w3.org/ns/oa#questioning' => 'oa:questioning',
'http://www.w3.org/ns/oa#replying' => 'oa:replying',
'http://www.w3.org/ns/oa#tagging' => 'oa:tagging',
```

## Annotation

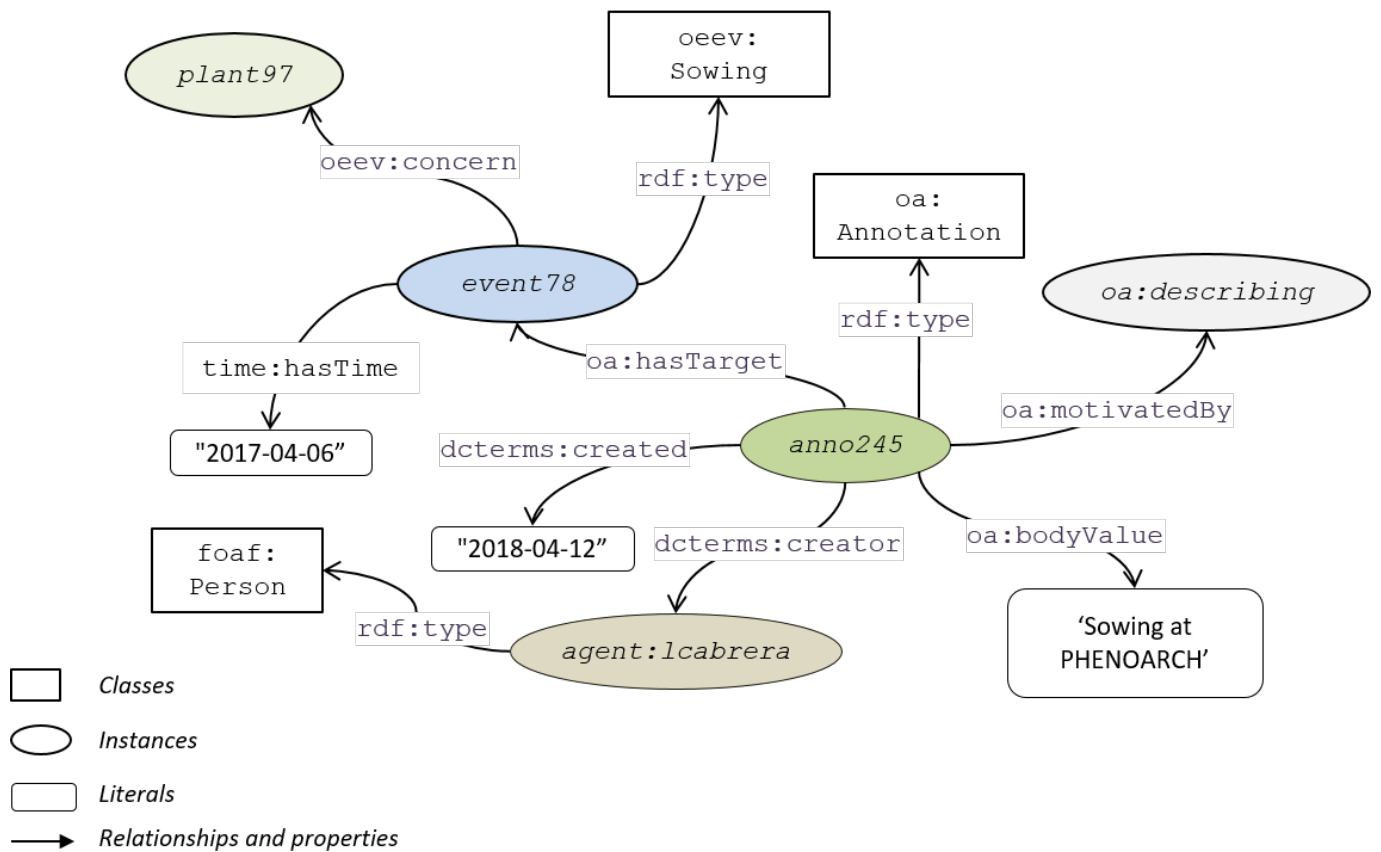

**Dublin Core** and **foaf** specifications such as `dcterms:created`, `dcterms:creator`, `foaf:Agent` are also used. For instance, the agent `agent:Lcabrera`, is a `Person` member of the group `PHENOARCH-ADMIN` that has a number of attributes such as `firstName`, `lastName`, `mbox`, etc. The Agent `agent:Lcabrera` is the author (`dcterms:creator`) of the annotation#245 (Fig. 6).

## Agent

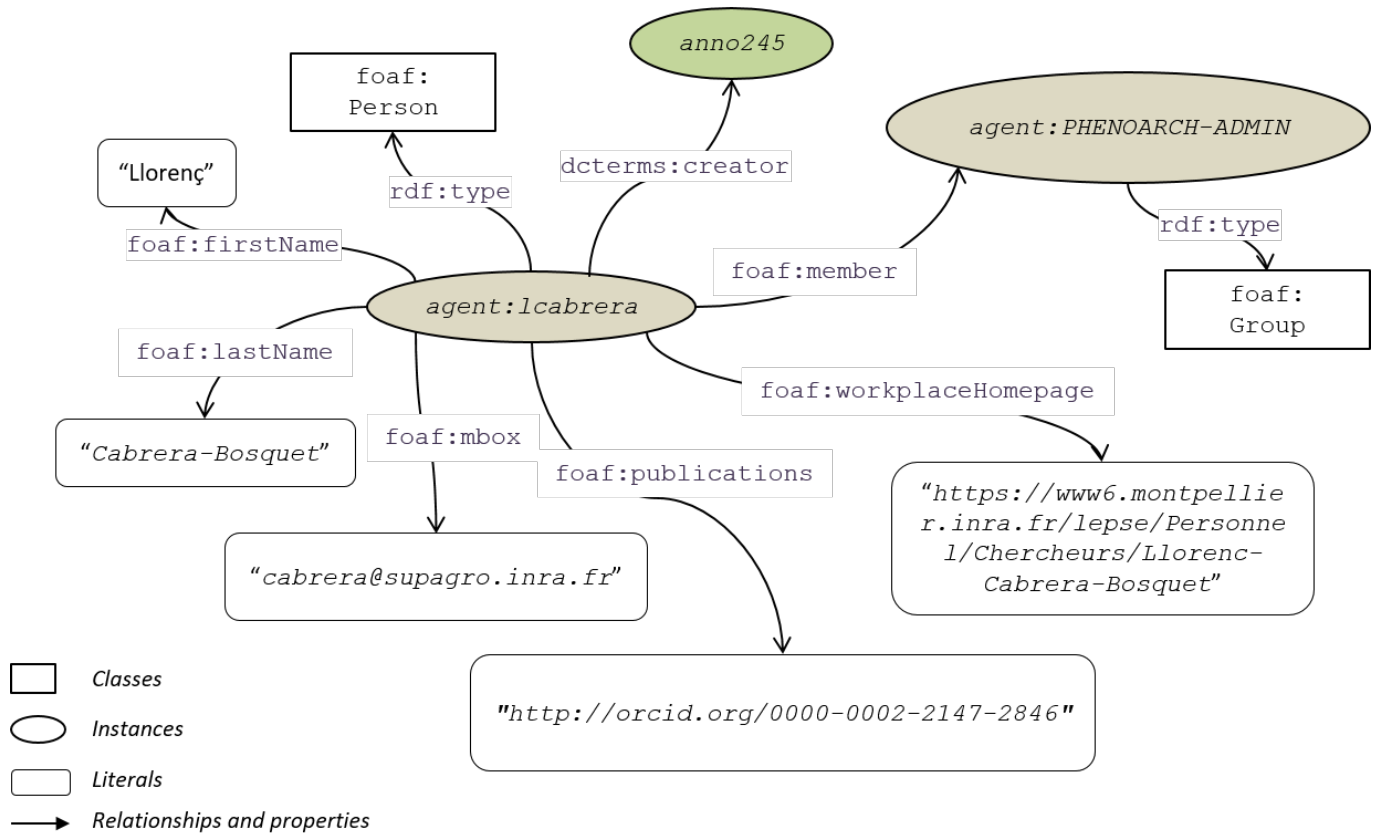

The different prefixes stand for:

- oeev: <http://www.phenome-fppn.fr/vocabulary/2018/oeev#>
- oa: <http://www.w3.org/ns/oa#>
- foaf: <http://xmlns.com/foaf/spec/>
- rdf: <http://www.w3.org/1999/02/22-rdf-syntax-ns#>
- time: <http://www.w3.org/2006/time#>
- dcterms: <http://purl.org/dc/terms/>
- agent: <http://www.phenome-fppn.fr/id/agent/>

Annotations and events can be added into any object (e.g. plant, device, experiment, event) by clicking on the **add annotation** and **add event** buttons present in the different menus:



par02\_s1

Return to the list Add annotation Add event

|                  |                                                                                                                           |
|------------------|---------------------------------------------------------------------------------------------------------------------------|
| Device Alias     | par02_s1                                                                                                                  |
| URI              | <a href="http://www.phenome-fppn.fr/m3p/dyn/2011/sa110038">http://www.phenome-fppn.fr/m3p/dyn/2011/sa110038</a>           |
| Device Type      | RadiationSensor                                                                                                           |
| Related Concept  | <a href="http://purl.oclc.org/NET/ssnx/meteo/aws#QuantumSensor">http://purl.oclc.org/NET/ssnx/meteo/aws#QuantumSensor</a> |
| Brand            | Skye Instruments                                                                                                          |
| Model            | SKP 215                                                                                                                   |
| Position (X,Y)   | Greenhouse Phenodyn                                                                                                       |
| Position (meter) | (not set)                                                                                                                 |
| Variable         | PAR Light.weather station.micromole.m-2.s-1                                                                               |
| Documents        |                                                                                                                           |

### Register an Event

Type \*

manual calibration

2018-05-15 13:30

Concern \*

<http://www.phenome-fppn.fr/m3p/dyn/2011/sa110038>

Description \*

My comment...|

Description cannot be blank.

Confidential

Create

## Use cases

### Lodging of plot

The following semantic graph represents how **OEEv** ontology is used for representing a lodging event associated to **plot97** (Fig. 7).

In the example presented here, the **event54** that concerns **plot97** is of type **Lodging** and occurred the **"2017-06-29"**. **event356** is associated to the **ann4807** which is of type **Annotation** and is motivated by describing (**oa:describing**). This annotation, has a creator (**Agent1**), a date of annotation ("**2017-08-10**") and a body value describing the event ("**Plots lodged after the storm**").

## Lodging of a plot

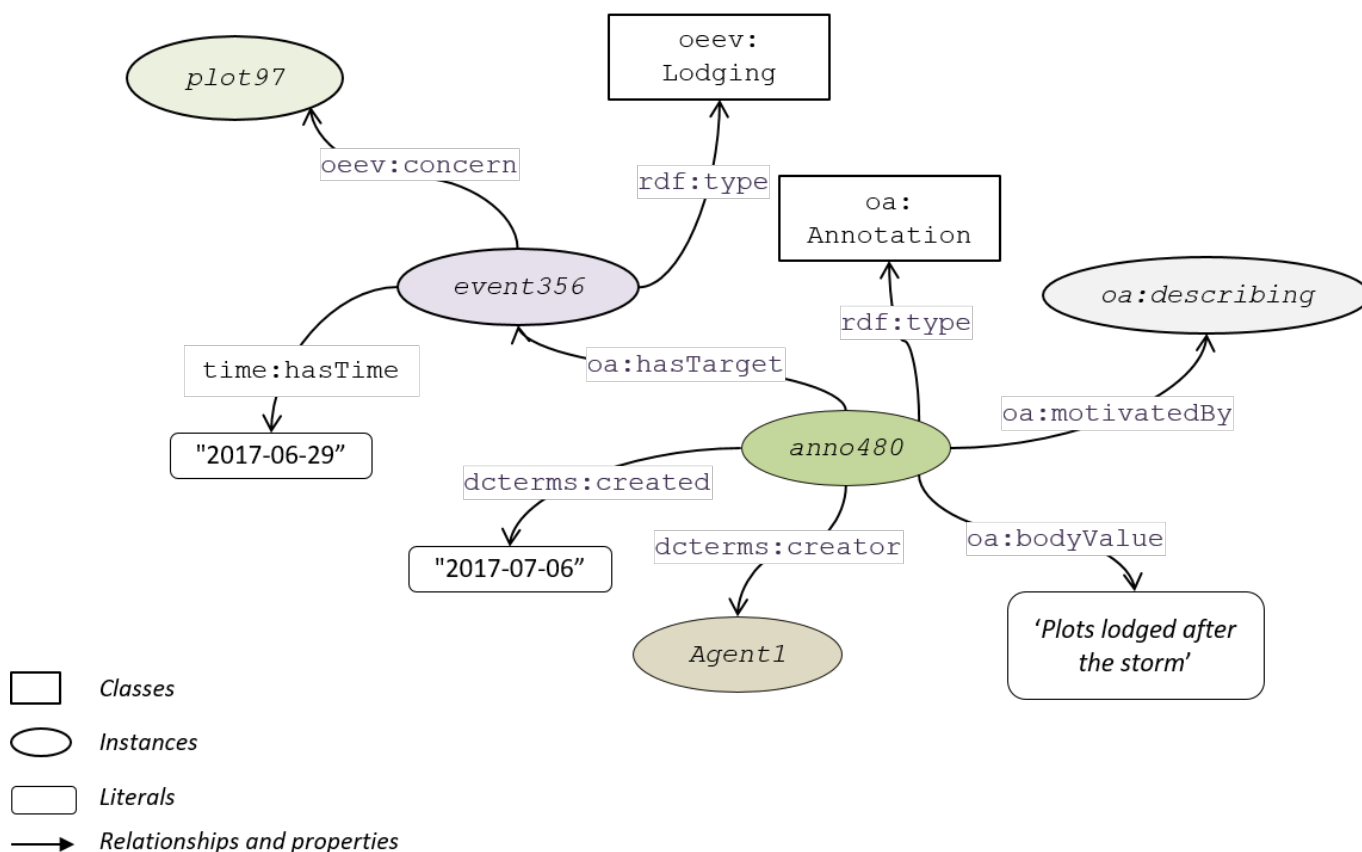

- Instances are depicted as coloured ellipses.
- Classes are depicted as white rectangles.
- Literals are depicted as white lozenges.
- Relationships and properties are depicted as black lines.

For better legibility objects are labelled with shortened alias names rather than using full URIs:

- **plot97**: <http://www.phenome-fppn.fr/diaphen/2017/o17000097> **Agent1**: <http://www.phenome-fppn.fr/id/agent/rchapuis>
- **event356**: <http://www.phenome-fppn.fr/id/event/cafa1c09-2cbf-409f-82f9-9f20496e3eb9>
- **anno480**: <http://www.phenome-fppn.fr/id/annotation/469bca50-10f9-4deb-9b3a-6ae7476306cb>

Note that not all objects and events associated to **plot97** are represented in this graph. Fulls details can be found in the PHIS user interface by searching for plot 97 in the different menus (e.g. **Events**, **Scientific objects**).

The event can be displayed in the web user interface by filtering by lodging and plot97 in the Events menu. Further information can be displayed by clicking on the [Browse Triplestore](#) button:

Phenotyping Hybrid Information System Experimental Organization - Data - Tools -  Llorenç Cabrera-Bosquet

Home / Events / <http://www.phenome-fppn.fr/id/event/c4f52303-62af-4e4c-9e72-4ef4c8c17be5>

## http://www.phenome-fppn.fr/id/event/c4f52303-62af-4e4c-9e72-4ef4c8c17be5

[Add annotation](#) [Browse Triplestore](#)

|               |                                                                                                         |
|---------------|---------------------------------------------------------------------------------------------------------|
| Type          | oeev:Lodging                                                                                            |
| Description   | Plots lodged after the storm                                                                            |
| Author        | <a href="http://www.phenome-fppn.fr/id/agent/rchapuis">http://www.phenome-fppn.fr/id/agent/rchapuis</a> |
| Date of Event | 2017-06-29T12:00:00+01:00                                                                               |
| Concern       | <a href="#">diaphen:/2017/o17000097</a>                                                                 |
| Alias         | 97/DZ_PG_45/ZM4385/WWW/2/DIA2017-05-19                                                                  |

<http://www.phenome-fppn.fr/id/annotation/8ca4a5c2-3b4d-4159-b888-278730f583c0>

[Add annotation](#) [Add Event](#)

Showing 1-5 of 5 items.

| # | Subject                                                                                                                                                                   | Predicate                                               | Object or Literal                                       |
|---|---------------------------------------------------------------------------------------------------------------------------------------------------------------------------|---------------------------------------------------------|---------------------------------------------------------|
|   | <input type="text" value="Type in some characters..."/>                                                                                                                   | <input type="text" value="Type in some characters..."/> | <input type="text" value="Type in some characters..."/> |
| 1 | <a href="http://www.phenome-fppn.fr/id/annotation/8ca4a5c2-3b4d-4159-b888-278730f583c0">http://www.phenome-fppn.fr/id/annotation/8ca4a5c2-3b4d-4159-b888-278730f583c0</a> | dcterms:created                                         | 2017-07-06T12:00:00+01:00                               |
| 2 | <a href="http://www.phenome-fppn.fr/id/annotation/8ca4a5c2-3b4d-4159-b888-278730f583c0">http://www.phenome-fppn.fr/id/annotation/8ca4a5c2-3b4d-4159-b888-278730f583c0</a> | dcterms:creator                                         | <a href="#">pxPhenome:/id/agent/rchapuis</a>            |
| 3 | <a href="http://www.phenome-fppn.fr/id/annotation/8ca4a5c2-3b4d-4159-b888-278730f583c0">http://www.phenome-fppn.fr/id/annotation/8ca4a5c2-3b4d-4159-b888-278730f583c0</a> | rdf:type                                                | <a href="#">oa:Annotation</a>                           |
| 4 | <a href="http://www.phenome-fppn.fr/id/annotation/8ca4a5c2-3b4d-4159-b888-278730f583c0">http://www.phenome-fppn.fr/id/annotation/8ca4a5c2-3b4d-4159-b888-278730f583c0</a> | oa:bodyValue                                            | Plots lodged after the storm                            |
| 5 | <a href="http://www.phenome-fppn.fr/id/annotation/8ca4a5c2-3b4d-4159-b888-278730f583c0">http://www.phenome-fppn.fr/id/annotation/8ca4a5c2-3b4d-4159-b888-278730f583c0</a> | oa:motivatedBy                                          | <a href="#">oa:describing</a>                           |

## Plant blocked in imaging cabin

The following semantic graph represents how **OEev** ontology is used for representing an incident during imaging acquisition associated to **plant795** (Fig. 10).

In the example presented here, the **event849** that concerns **plant795** is of type **PlantStuck** and occurred the **"2017-05-15"**. **event849** is associated to the **anno86** which is of type **Annotation** and is motivated by describing (**oa:describing**). This annotation, has a creator (**Agent2**), a date of annotation ("**2017-05-26**") and a body value describing the event ("**Fallen plant during imaging**").



## Plant stuck in cabin

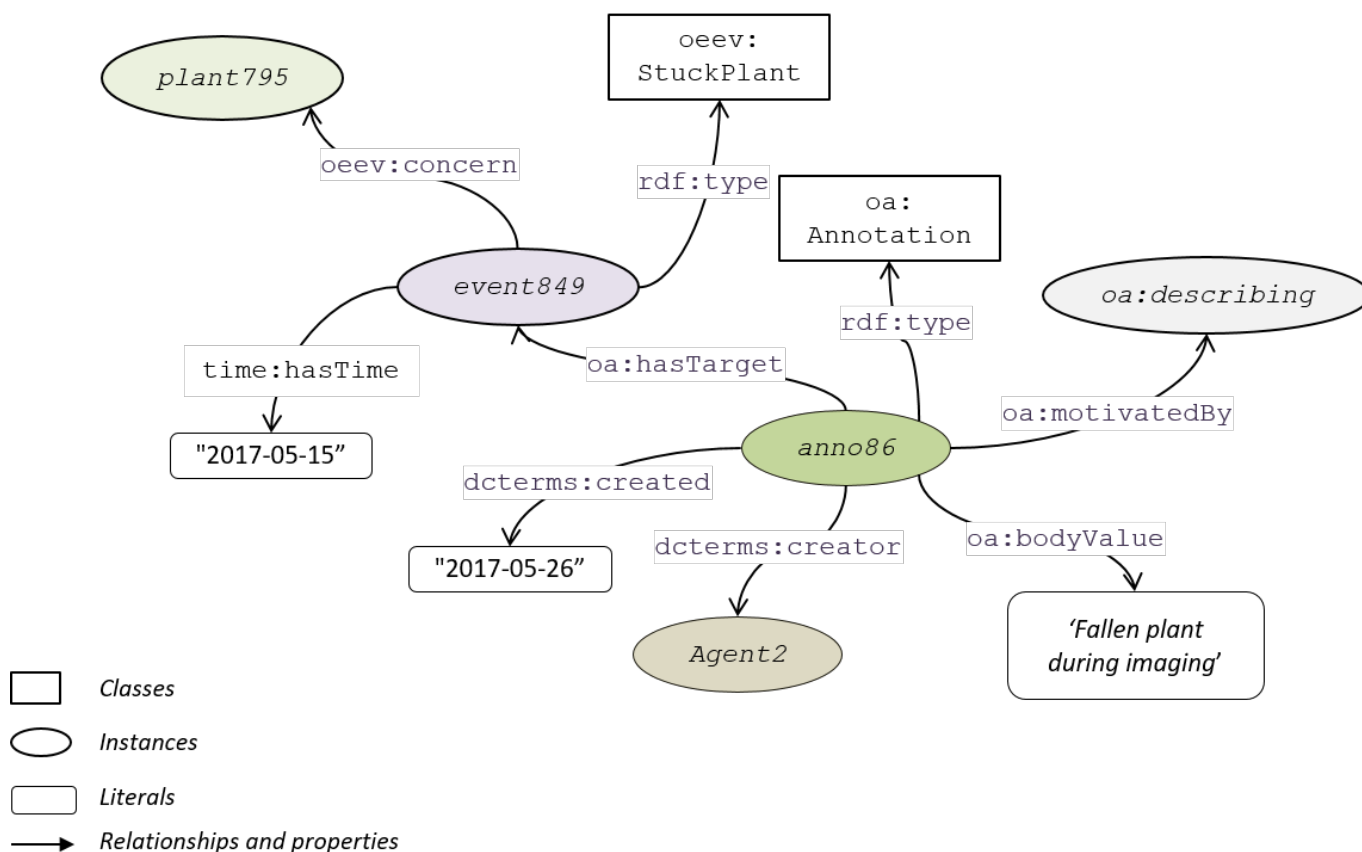

- Instances are depicted as coloured ellipses.
- Classes are depicted as white rectangles.
- Literals are depicted as white lozenges.
- Relationships and properties are depicted as black lines.

For better legibility objects are labelled with shortened alias names rather than using full URIs:

- **plant795**: <http://www.phenome-fppn.fr/m3p/arch/2017/c17000795> **Agents**:
- <http://www.phenome-fppn.fr/id/agent/lcabrera> **event849**: <http://www.phenome-fppn.fr/id/event/bcbb7240-34bc-4bc3-8ff3-31911e4b6aa7> **anno86**: <http://www.phenome-fppn.fr/id/annotation:4aac3076-b542-4f6e-92e1-9d350dd3eec5>

Note that not all objects and events associated to **plant795** are represented in this graph. Full details can be found in the PHIS user interface by searching for plant 97 in the different menus (e.g. **Events**, **Scientific objects**).

## Suspected seed contamination

The following semantic graph represents how **OEEv** ontology is used for annotating an anomaly detected during data processing (i.e. suspected seed contamination) (Fig. 11).

The **anno338** which is of type **Annotation** and is motivated by tagging (**oa:tagging**) has as target **plant816**. The **anno338** has a creator (**Agent2**), a date of annotation ("**2018-05-17 11:02:39**") and a body value describing the event ("**Suspected seed contamination**").

## Expert annotation during data processing

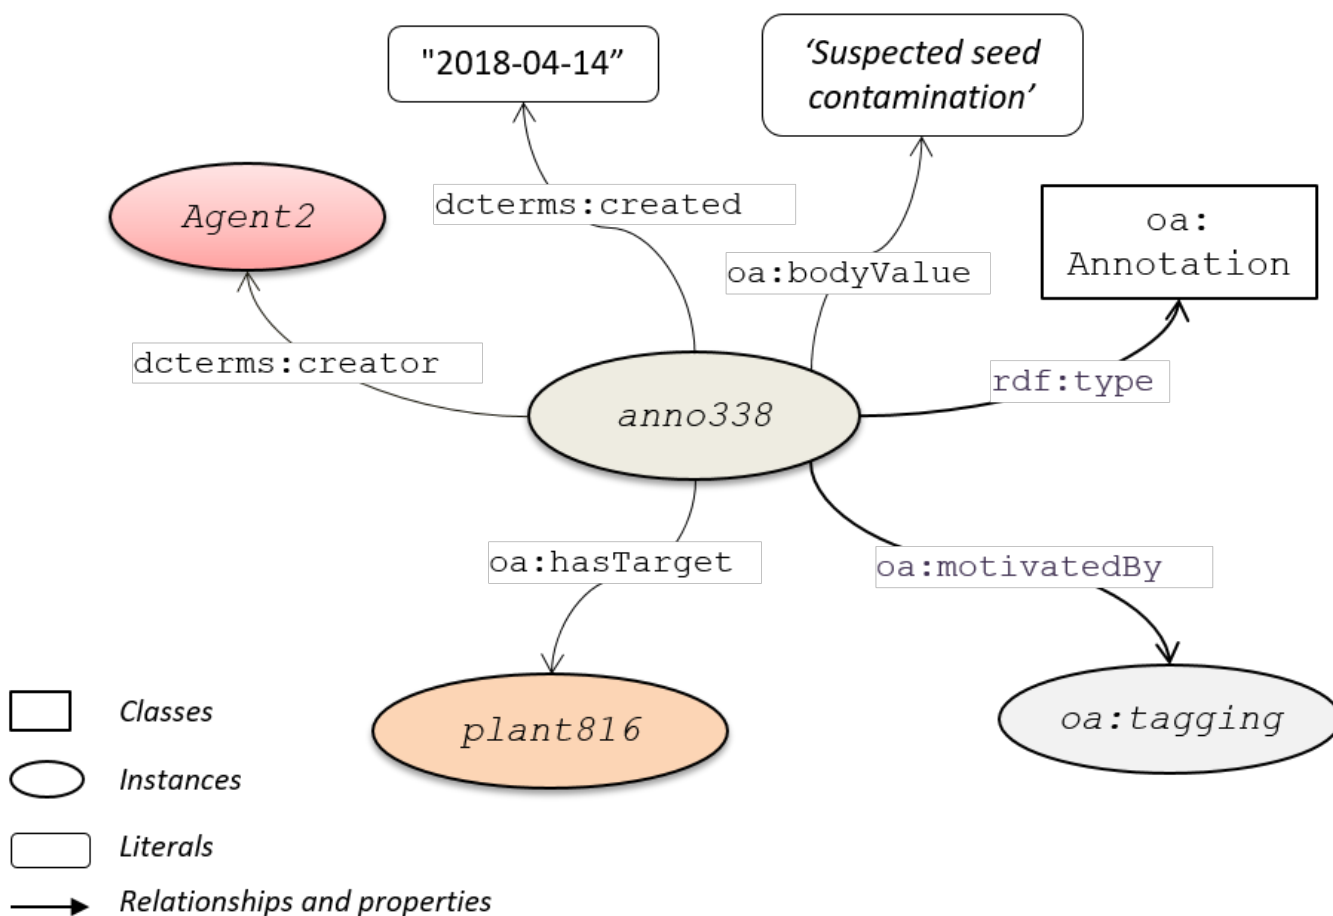

- Instances are depicted as coloured ellipses.
- Classes are depicted as white rectangles.
- Literals are depicted as white lozenges.
- Relationships and properties are depicted as black lines.

For better legibility objects are labelled with shortened alias names rather than using full URIs:

- **plant816**: <http://www.phenome-fppn.fr/m3p/arch/2017/c17000816>
- **Agent2**: <http://www.phenome-fppn.fr/id/agent/lcabrera>
- **anno338**: <http://www.phenome-fppn.fr/id/annotation/5b0bd064452b1>

Note that not all objects and events associated to **plant816** are represented in this graph. Fulls details can be found in the PHIS user interface by searching for plant 97 in the different menus (e.g. **Events**, **Scientific objects**).

## Camera Dysfunction

In this example the target is a RGB camera that suffered a dysfunction (Fig. 12):

## Camera dysfunction

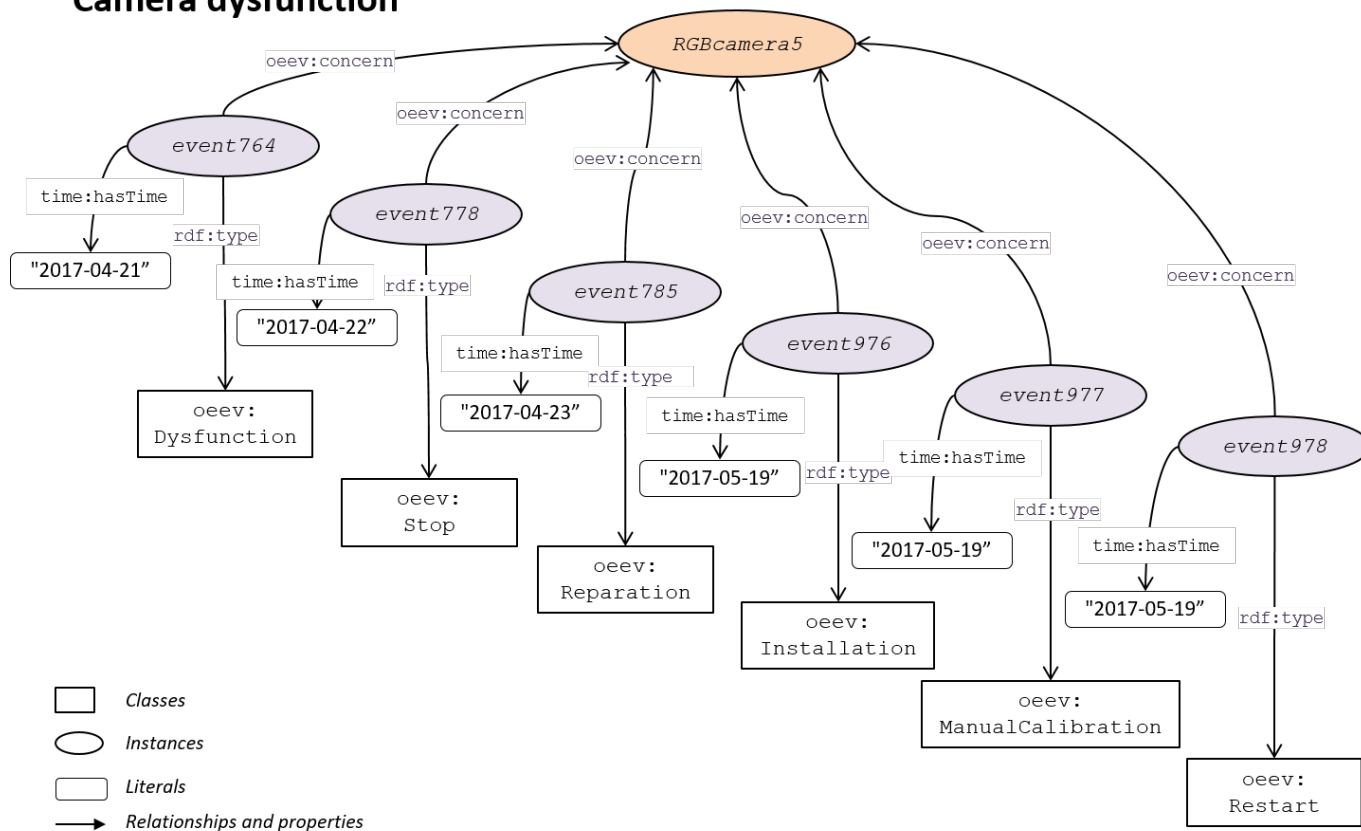

As represented in the semantic graph the **RGBcamera5** suffered as **Dysfunction** the "2017-04-21". The "2017-04-22", image acquisition was stopped in cabin 5 as represented with the event **Stop**. The "2017-04-23" the camera was sent to the factory for **Reparation**. The "2017-05-19", the repaired camera was reinstalled and calibrated before being put in service again, as represented by the **Installation**, **ManualCalibration** and **Restart** events.

For better legibility objects are labelled with shortened alias names rather than using full URIs:

- **RGBcamera5**: <http://www.phenome-fppn.fr/m3p/arch/2018/ac180011> **event764**:
- <http://www.phenome-fppn.fr/id/event/dda84a5e-8783-4f60-8d80-d5a3ccb36b25> **event778**:
- <http://www.phenome-fppn.fr/id/event/8be63f29-b3ba-4d0a-b40b-775d6119b167>
- **event785**: <http://www.phenome-fppn.fr/id/event/39a5a56a-bec8-4a35-a4dc-35d9c13b480f>
- **event976**: <http://www.phenome-fppn.fr/id/event/2ed84816-516f-4621-b7b9-face4ac7de4>
- **event977**: <http://www.phenome-fppn.fr/id/event/2ed6d628-c076-42d1-b8ba-014eaade4701>
- **event978**: <http://www.phenome-fppn.fr/id/event/05dc3267-9cce-4bce-8175-a7b2e04d663f>

Only event types and dates are represented. Full details can be consulted online in the Events or Device menu by searching for *camera* or <http://www.phenome-fppn.fr/m3p/arch/2018/ac180011> (Fig. 13).

## Events

Date Range

Start Date  and End Date

Showing 1-8 of 8 items.

| # | Type                   | Description                                    | Concern                | Alias        | Date of Event             |
|---|------------------------|------------------------------------------------|------------------------|--------------|---------------------------|
|   | event                  |                                                | /ac180011              |              |                           |
| 1 | oeev.ManualCalibration | Calibration                                    | m3p/arch/2018/ac180011 | camera_top_5 | 2017-10-31T12:00:00+01:00 |
| 2 | oeev.Restart           | Restart image acquisition in cabin 5           | m3p/arch/2018/ac180011 | camera_top_5 | 2017-05-19T12:00:00+01:00 |
| 3 | oeev.ManualCalibration | Calibration                                    | m3p/arch/2018/ac180011 | camera_top_5 | 2017-05-19T12:00:00+01:00 |
| 4 | oeev.Installation      | Installation of repaired top camera on cabin 5 | m3p/arch/2018/ac180011 | camera_top_5 | 2017-05-19T12:00:00+01:00 |
| 5 | oeev.Repairation       | Camera sent to factory                         | m3p/arch/2018/ac180011 | camera_top_5 | 2017-04-23T12:00:00+01:00 |
| 6 | oeev.Stop              | Stop image acquisition in cabin 5              | m3p/arch/2018/ac180011 | camera_top_5 | 2017-04-22T12:00:00+01:00 |
| 7 | oeev.Dysfunction       | Top camera cabin 5 dysfunctioning              | m3p/arch/2018/ac180011 | camera_top_5 | 2017-04-21T12:00:00+01:00 |
| 8 | oeev.Start             | In service date                                | m3p/arch/2018/ac180011 | camera_top_5 | 2016-04-01T12:00:00+01:00 |

## Leaf Sampling

In this example, the sampling of a leaf of plant 60 is represented (Fig. 14):

### Leaf sampling

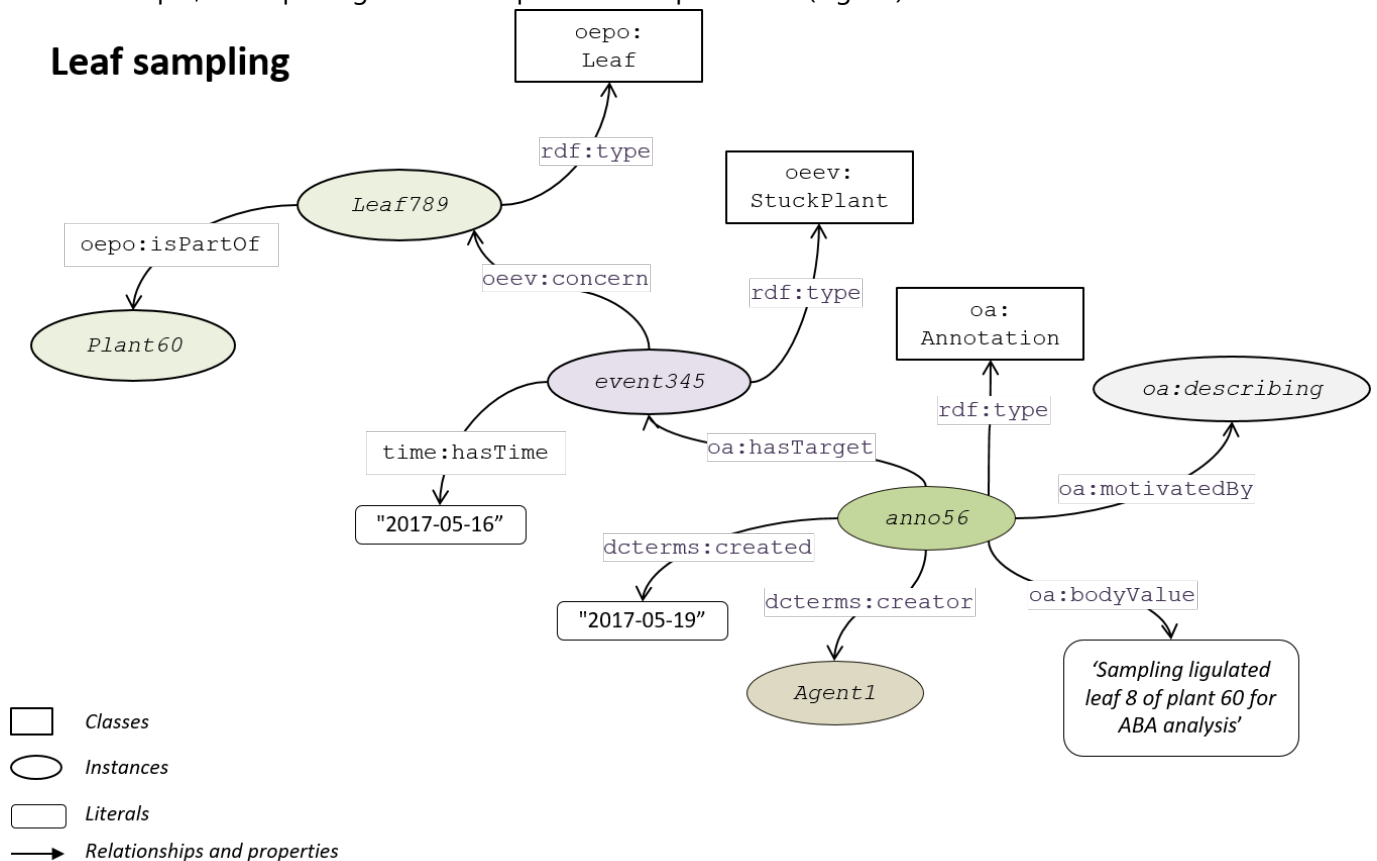

The real example concerning leaf <http://www.phenome-fppn.fr/m3p/arch/2017/lc17000060> can be consulted online by searching for sampling events in the **Events** menu:

## Events

### Date Range

|            |     |          |
|------------|-----|----------|
| Start Date | and | End Date |
|------------|-----|----------|

Refresh

Showing 1-1 of 1 item.

| # | Type         | Description                                            | Concern                                                                  | Alias                                                | Date of Event                   |
|---|--------------|--------------------------------------------------------|--------------------------------------------------------------------------|------------------------------------------------------|---------------------------------|
| 1 | oev:Sampling | Sampling ligulated leaf 8 of plant 60 for ABA analysis | <a href="http://m3p:/arch/2017/lc17000060">m3p:/arch/2017/lc17000060</a> | 0060/DZ_PG_27/ZM4354/WD/Veg_1/01_60/8/ARCH2017-03-30 | 2017-05-16T12:00:00+01:00 10:51 |

<http://www.phenome-fppn.fr/id/event/b020e89f-3ac7-4eee-baa0-70c3cbec30ce>

Add annotation

Browse Triplestore

|               |                                                                                                         |
|---------------|---------------------------------------------------------------------------------------------------------|
| Type          | oev:Sampling                                                                                            |
| Description   | Sampling ligulated leaf 8 of plant 60 for ABA analysis                                                  |
| Author        | <a href="http://www.phenome-fppn.fr/id/agent/lcabrera">http://www.phenome-fppn.fr/id/agent/lcabrera</a> |
| Date of Event | 2017-05-16T12:00:00+01:00 10:51                                                                         |
| Concern       | <a href="http://m3p:/arch/2017/lc17000060">m3p:/arch/2017/lc17000060</a>                                |
| Alias         | 0060/DZ_PG_27/ZM4354/WD/Veg_1/01_60/8/ARCH2017-03-30                                                    |
